# Supplementary material for: High physical work demands and working life expectancy in Denmark
Source: PubMed Central journal article supplement — Occup Environ Med. 2020 May 12;77(8):576–82. doi: 10.1136/oemed-2019-106359 (PMC7402449; doi:10.1136/oemed-2019-106359), 2020-05-12

## Supplementary material

The physical demand scale contains an individual sum of the score values made of the eight questions: “Does your work cause you to...”(1) “stand in the same place?”, (2) “work with the back bent strongly forward without support from the hands and arms?”, (3) “twist or bend the back several times per hour?”, (4) “have the hands lifted to or above shoulder height (2000 round), have the arms lifted to or above shoulder height (2005 round)”, (5) “perform the same arm movements several times a minute? (eg, package work, mounting, machine feeding, carving)”, (6) “squat or kneel when you work?”, (7) “lift or carry?”, and (8) “push or pull?”.

The response options were: never (score value 1), seldom/very little (score value 2), approximately 1/4 of the time (score value 3), approximately 1/2 of the time (score value 4), approximately 3/4 of the time (score value 5), almost all the time (score value 6).

**Table 1 The top ten occupations with high physical work demands by sex (including DISCO-08 code).**

| Men                                               | n     | Women                                                                 | n     |
|---------------------------------------------------|-------|-----------------------------------------------------------------------|-------|
| 7115 Carpenters and Joiners                       | 17427 | 9112 Cleaners and Helpers in Offices, Hotels and Other Establishments | 22164 |
| 7112 Bricklayers and Related Workers              | 7563  | 8160 Food and Related Products Machine Operators                      | 4443  |
| 8160 Food and Related Products Machine Operators  | 6595  | 751 Food Processing and Related Trades Workers                        | 2797  |
| 7131 Painters and Related Workers                 | 4357  | 8142 Plastic Products Machine Operators                               | 1614  |
| 5120 Cooks                                        | 3915  | 5120 Cooks                                                            | 1075  |
| 9313 Building Construction Labourers              | 3166  | 9321 Hand Packers                                                     | 736   |
| 7126 Plumbers and Pipe Fitters                    | 2942  | 6113 Gardeners; Horticultural and Nursery Growers                     | 650   |
| 7231 Motor Vehicle Mechanics and Repairers        | 2512  | 912 Vehicle, Window, Laundry and Other Hand Cleaning Workers          | 311   |
| 712 Building Finishers and Related Trades Workers | 2489  | 5111 Travel Attendants and Travel Stewards                            | 304   |
| 8142 Plastic Products Machine Operators           | 2392  | 911 Domestic, Hotel and Office Cleaners and Helpers                   | 140   |

**Table 2 The top ten occupations with medium physical work demands by sex (including DISCO-08 code).**

| Men                                                                   | n      | Women                                 | n      |
|-----------------------------------------------------------------------|--------|---------------------------------------|--------|
| 9999 Unknown                                                          | 157417 | 9999 Unknown                          | 108132 |
| 5223 Shop Sales Assistants                                            | 30685  | 5322 Home-based Personal Care Workers | 52955  |
| 2341 Primary School Teachers                                          | 22045  | 2343 Pedagogical work                 | 47296  |
| 9334 Shelf Fillers                                                    | 21449  | 2221 Nursing Professionals            | 45130  |
| Heavy Truck and Lorry Drivers                                         | 17867  | 2341 Primary School Teachers          | 44548  |
| 7411 Building and Related Electricians                                | 16655  | 5223 Shop Sales Assistants            | 43080  |
| 9312 Civil Engineering Labourers                                      | 15353  | 5321 Health Care Assistants           | 41968  |
| 5153 Building Caretakers                                              | 13964  | 5311 Child Care Workers               | 40002  |
| 9112 Cleaners and Helpers in Offices, Hotels and Other Establishments | 11517  | 2357 Special Pedagogical work         | 21075  |
| 5230 Cashiers and Ticket Clerks                                       | 11159  | 5230 Cashiers and Ticket Clerks       | 20748  |

**Table 3 The top ten occupations with low physical work demands by sex (including DISCO-08 code).**

| Men                                           | n     | Women                                          | n     |
|-----------------------------------------------|-------|------------------------------------------------|-------|
| 3322 Commercial Sales Representatives         | 16512 | 4110 General Office Clerks                     | 41535 |
| 1120 Managing Directors and Chief Executives  | 14953 | 3343 Administrative and Executive Secretaries  | 20423 |
| 2512 Software Developers                      | 13517 | 3313 Accounting Associate Professionals        | 13868 |
| 2000 Professionals                            | 12630 | 2310 University and Higher Education Teachers  | 10653 |
| 2310 University and Higher Education Teachers | 12426 | 2000 Professionals                             | 9977  |
| 4110 General Office Clerks                    | 9372  | 2635 Social Work and Counselling Professionals | 9872  |
| 2412 Financial and Investment Advisers        | 9045  | 3344 Medical Secretaries                       | 9648  |
| 2142 Civil Engineers                          | 8370  | 3322 Commercial Sales Representatives          | 8929  |
| 2511 Systems Analysts                         | 8090  | 2221 Nursing Professionals                     | 8368  |
| 8331 Bus and Tram Drivers                     | 6403  | 2412 Financial and Investment Advisers         | 8019  |

**Figure 1** The expected difference in years of work, unemployed and on sickness absence, divided between high and low physical demands group, age, and sex

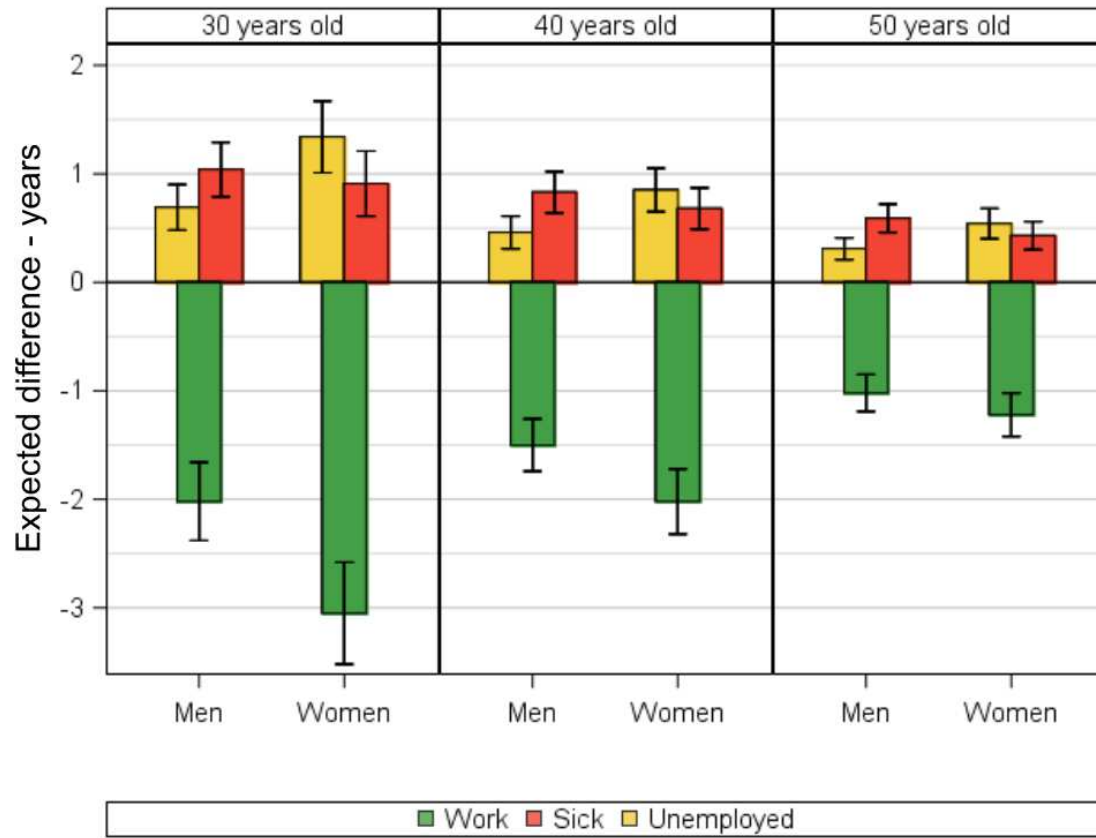

Supplement: oemed-2019-106359supp001.pdf [file oemed-2019-106359supp001.pdf]
